# Supplementary material
Source: PubMed Central journal article supplement (PMC1867894)
Supplement: bmj_334_7601_997__1.pdf [file bmj_334_7601_997__1.pdf]

- W1. Bode G, Brenner H, Adler G, Rothenbacher D. Recurrent abdominal pain in children: evidence from a population-based study that social and familial factors play a major role but not *Helicobacter pylori* infection. *J Psychosom Res* 2003;54(5):417-21.
- W2. Miele E, Simeone D, Marino A, Greco L, Auricchio R, Novek SJ, Staiano A. Functional gastrointestinal disorders in children: an Italian prospective survey. *Pediatrics* 2004;114:73-8.
- W3. Uc A, Hyman PE, Walker LS. Functional gastrointestinal disorders in African American children in primary care. *J Pediatr Gastroenterol Nutr.* 2006 ;42:270-4.
- W4. Howell S, Poulton R, Talley NJ. The natural history of childhood abdominal pain and its association with adult irritable bowel syndrome: birth-cohort study. *Am J Gastroenterol* 2005; 100(9):2071-8.
- W5. Linna SL, Moilanen I, Keistinen H, Ervall ML, Karppinen MM. Prevalence of psychosomatic symptoms in children. *Psychother Psychosom* 1991;56:85-7.
- W6. Perquin CW, Hazebroek-Kampschreur AA, Hunfeld JA, Bohnen AM, van Suijlekom-Smit LW, Passchier J et al. Pain in children and adolescents: a common experience. *Pain* 2000; 87(1):51-8.
- W7. Hyams JS, Burke G, Davis PM, Rzepski B, Androlonis PA. Abdominal pain and irritable bowel syndrome in adolescents: a community based study. *J Pediatr* 1996;129:220-6.
